# Supplementary material
Source: PubMed Central journal article supplement (PMC7953109)
Supplement: sj-pdf-1-vdi-10.1177_1040638721990333.pdf [file sj-pdf-1-vdi-10.1177_1040638721990333.pdf]

**Supplementary Table 1.** Representatives of bat alphacoronavirus and bat betacoronavirus groups B, C, and D available in the GenBank database used for the in-silico analysis.

| Genus/Group                        | GenBank accession/Definition                               |
|------------------------------------|------------------------------------------------------------|
| <i>Alphacoronavirus</i>            | JQ989267                                                   |
|                                    | JQ989270                                                   |
|                                    | JQ989269                                                   |
|                                    | EF203064, Bat coronavirus HKU2 strain HKU2/GD/430/2006     |
|                                    | NC_009988, Bat alphacoronavirus HKU2                       |
|                                    | NC_010438, Bat coronavirus HKU8                            |
|                                    | NC_010437, Bat coronavirus 1A                              |
|                                    | NC_010438, Bat alphacoronavirus HKU8                       |
|                                    | NC_010437, Bat coronavirus 1A                              |
|                                    | NC_022103, Bat coronavirus CDPHE15/USA/2006                |
| <i>Betacoronavirus</i>             | NC_009021, Bat betacoronavirus HKU9-1                      |
|                                    | NC_009021, Bat coronavirus HKU9-1                          |
|                                    | HQ166910.1, Zaria bat coronavirus strain ZBCoV             |
| <i>Betacoronavirus</i> group B     | DQ022305, Bat SARS beta coronavirus HKU3-1                 |
|                                    | KC881005, Bat SARS-like coronavirus RsSHC014               |
|                                    | KC881006, Bat SARS-like coronavirus Rs3367                 |
|                                    | KF367457, Bat SARS-like coronavirus WIV1                   |
|                                    | KY417148, Bat SARS-like coronavirus isolate Rs4247         |
|                                    | KY417150, Bat SARS-like coronavirus isolate Rs4874         |
|                                    | KY417151, Bat SARS-like coronavirus isolate Rs7327         |
|                                    | KT444582, SARS-like coronavirus WIV16                      |
|                                    | JX993987.1, Bat coronavirus Rp/Shaanxi2011                 |
|                                    | KF569996.1, Rhinolophus affinis coronavirus isolate LYRa11 |
|                                    | DQ071615, Bat SARS coronavirus Rp3                         |
|                                    | MN996532, Bat coronavirus RaTG13                           |
|                                    | <i>Betacoronavirus</i> group C                             |
| NC_009020, Bat coronavirus HKU5-1  |                                                            |
| EF065505.1, Bat coronavirus HKU4-1 |                                                            |
| EF065509, Bat coronavirus HKU5-1   |                                                            |
| <i>Betacoronavirus</i> group D     | EF065513, Bat coronavirus HKU9-1                           |
|                                    | EF065514, Bat coronavirus HKU9-2                           |
|                                    | EF065513, Bat coronavirus HKU9-1                           |
